# Supplementary material
Source: HighWire-hosted journal article supplement (https://www.jneurosci.org/content/38/39/8433)
Supplement: inline-supplementary-material-3 [file inline-supplementary-material-3.docx]

**Figure 4-1**

**Amplitudes and bandwidths of response profiles in the heterogeneous context**

|  | V1 | | V2 | | V3 | | V4 | |
| --- | --- | --- | --- | --- | --- | --- | --- | --- |
|  | Attend All | Attend  Target | Attend All | Attend  Target | Attend All | Attend  Target | Attend All | Attend  Target |
| Amplitude | 0.14 | 0.23 | 0.14 | 0.22 | 0.11 | 0.24 | 0.08 | 0.06 |
| Bandwidth (°) | 27.56 | 21.63 | 26.54 | 22.02 | 31.46 | 20.36 | 18.39 | 20.47 |
