# Supplementary material
Source: HighWire-hosted journal article supplement (https://www.jneurosci.org/content/38/39/8433)
Supplement: inline-supplementary-material-6 [file inline-supplementary-material-6.docx]

**Model statistics in the heterogeneous context**

|  |  | *Wt* | | | *Wf* | | | Model fit | |
| --- | --- | --- | --- | --- | --- | --- | --- | --- | --- |
|  |  | *B* | *Beta* | *p* | *B* | *Beta* | *p* | *R2* | *p* |
| V1 | Attend All | 0.10 | 0.46 | 0.001 | 0.87 | 0.01 | 0.948 | 0.21 | 0.005 |
| Attend Target | 0.23 | 0.69 | <0.001 | 0.76 | 0.01 | 0.963 | 0.47 | <0.001 |
| V2 | Attend All | 0.02 | 0.09 | 0.539 | 0.97 | 0.01 | 0.936 | 0.01 | 0.823 |
| Attend Target | 0.24 | 0.63 | <0.001 | 0.74 | 0.004 | 0.970 | 0.40 | <0.001 |
| V3 | Attend All | 0.04 | 0.25 | 0.089 | 0.93 | 0.01 | 0.933 | 0.06 | 0.230 |
| Attend Target | 0.25 | 0.70 | <0.001 | 0.74 | 0.01 | 0.966 | 0.49 | <0.001 |
| V4 | Attend All | 0.00 | 0.00 | 0.984 | 0.99 | 0.02 | 0.920 | 0.00 | 0.995 |
| Attend Target | 0.12 | 0.58 | <0.001 | 0.87 | 0.01 | 0.939 | 0.33 | <0.001 |
